# Supplementary material for: Artificial Intelligence (AI) Assisted Decision Making in Malignant Pleural Mesothelioma: A Comparative Study of AI Responses
Source: Research Square preprint supplement (doi:10.21203/rs.3.rs-6474443/v1), 2025-05-30
Supplement: Supplementary file 1 [file 9c3b8041218a7871b471fa27.docx]

Questions

1) What first-stage treatment would you recommend to the patient? (INITIAL TREATMENT RECOMMANDATIONS)

2) What would be your suggestion to the patient at this stage? (TIMING OF RADIOTHERAPY)

3) Radiotherapy is planned for the patient, what would be your suggestion at this stage? (RADIOTHERAPY PLANNING)

4) How do you define your target volume and the dose you will prescribe? (DOSIMETRIC EVALUATION)

5) The dose-volume parameters of this patient's planned radiotherapy are as shown in the figure. Do you accept it? (APPROVAL OF RADIOTHERAPY PLAN)
